# Supplementary material
Source: publisher figshare collection journal article supplement (https://gsapubs.figshare.com/ndownloader/files/23300588)
Supplement: Supplementary file 1 [file 23300588]

## Sheet: Feuil1
	Sample ID	KMK-2		KPA-8		CAU-1		CAU-3		NAV-3		NAV-4
		C		C		C		C		C		C-Fe
	wt. %
	Mn	59.2161		58.3469		62.3567		56.2916		60.5534		47.3162
	Al	0.395		0.816133		1.2411		3.086		1.5554		1.1424
	Fe	0.128467		0.3633		0.0913333		2.07553		0.84944		10.4213
	K	1.33907		1.6689		1.64977		1.7577		1.85592		2.0242
	Na	0.0437667		0.033		0.0948333		0.200733		0.1427		0.129867
	Zn	0.00226667		0.0143		0.0303667		0.0036		0.01018		0.0141333
	Co	0.0154333		0.00883333		0.0591		0.0224667		0.00996		0.00683333
	Ba	1.00263		0.788567		0.0257333		0.0074		0.00192		0.1475
	Ni	0.0006		0.001		0.00166667		0.00103333		0.00088		0.0049
	Ti	0.0004		0.0341667		0.000766667		0.0183		0.0022		0.00263333
	Mg	0.00156667		0.0154		0.00356667		0.00663333		0.00454		0.0690333
	Si	0.0711667		0.260333		0.0830667		0.192033		0.16794		0.3719
	Ca	0.0375		0.105833		0.0350667		0.0228333		0.00962		0.0345
	O	35.3881		35.6383		32.7526		32.23		32.5563		32.5301
	Total	97.6421		98.095		98.4257		95.9158		97.7204		94.2155
	Stoichiometric composition of cryptomelane based on 16 oxygens
	K	0.25		0.31		0.330637		0.357981		0.374196		0.408454
	MnIV	7.75		7.69		7.66936		7.64202		7.6258		7.59155
	MnIII	0.25		0.31		0.330637		0.357981		0.374196		0.408454
	- : Not detected; C = Cryptomelane; C-Fe = Iron-rich cryptomelane
				TABLE DR1
